path expression pattern

I

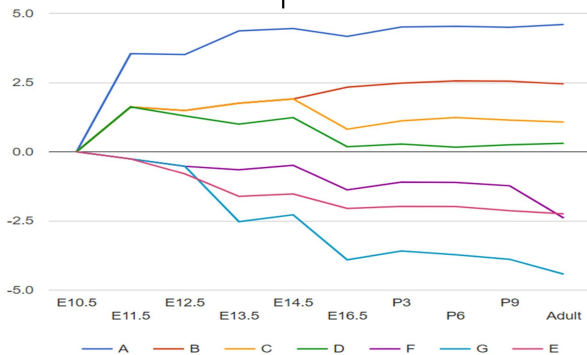

path expression pattern

II

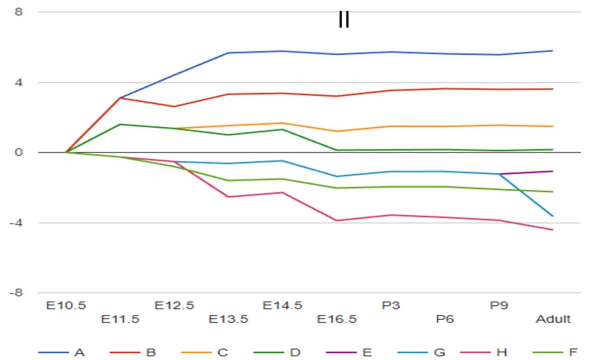

path expression pattern

III

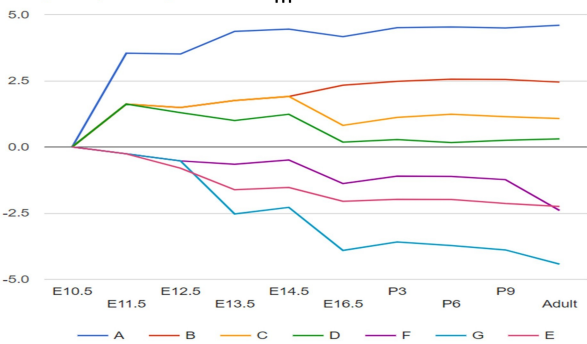

path expression pattern

IV

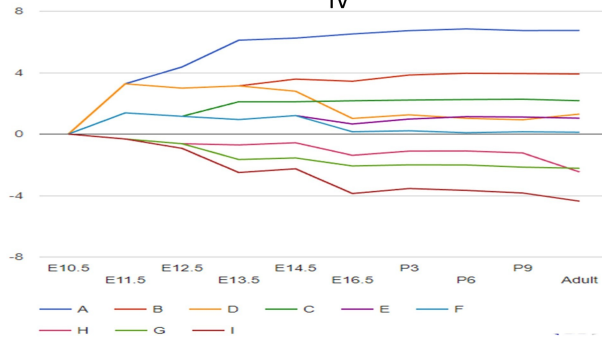

Source: https://storage.googleapis.com/plos-corpus-prod/10.1371/journal.pcbi.1006019/2/pcbi.1006019.s005.pdf
