# Supplementary material for: iDREM: Interactive visualization of dynamic regulatory networks
Source: PubMed Central journal article supplement (PMC5868853; doi:10.1371/journal.pcbi.1006019), 2018-03-14
Supplement: pcbi.1006019.s002.pdf [file pcbi.1006019.s002.pdf]

## GLOBAL CONFIG

(A)

Reset: RESET

50

Enable/Disable mouseover popup: 

20

Set Background

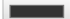

Set Node color

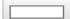

Set text color

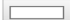

Set path color

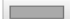

Click: Regulator

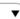

Shift Click: ToppGene

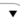

## Expression Panel

(D)

Show Path Expression

Explore Gene

Explore miRNA

Explore Gene/miRNA absolute expression

Explore Regulator targets expression

## Regulator Panel

(B)

Explore Regulator

Choose Regulator

Regulator rank cutoff:

50

## Epigenomics Panel

(E)

Explore gene methylation

Choose Time

Explore Regulator Methylation

Targets in node:

All

Explore methylation difference

Choose Methylation Time

Choose Methylation Time

View methylation track in UCSC genome browser

DataLink:

Data Type: bigWig

Data Reference: mm10

## Proteomics Panel

(F)

Explore Protein level

## Gene Enrichment Panel

(C)

Please input your gene list:

(comma/tab/space/newline delimited)

Search enriched nodes

## Cell Types Panel

(G)

Explore Single Cell Type

Choose Single Cell Types

Explore Sorted Cell Type

Choose Sorted Cell Types

## Path Function Panel

(H)

show path function Sankey diagram

Style 1 Style 2

GO term rank cutoff:

5

Sankey TF rank cutoff:

10

Sankey miRNA rank cutoff:

5

## Omnibus Panel

(I)

showOmnibus
