# Supplementary material for: iDREM: Interactive visualization of dynamic regulatory networks
Source: PubMed Central journal article supplement (PMC5868853; doi:10.1371/journal.pcbi.1006019), 2018-03-14

## GLOBAL CONFIG

Reset: 

43

Enable/Disable mouseover popup: 

20

Set Background Set Node color Set text color Set path color Click: Shift Click: 

Regulator Panel

Gene Enrichment Panel

Expression Panel

Epigenomic Panel

Proteomics panel

Cell Types Panel

Path Function Panel

Omnibus Panel

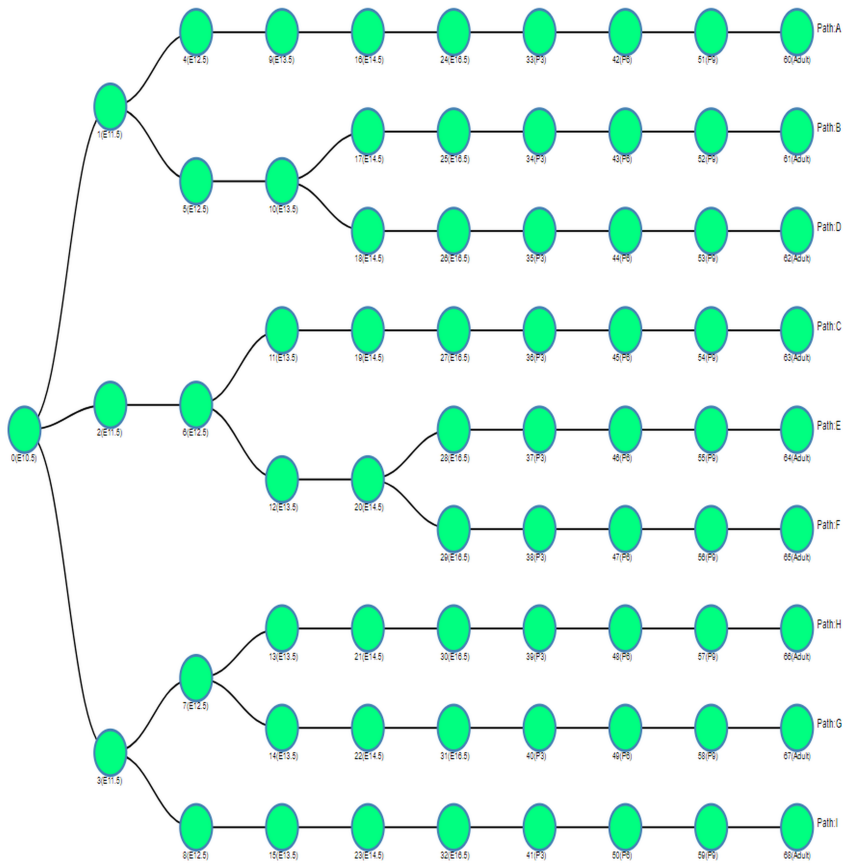

Supplement: pcbi.1006019.s003.pdf [file pcbi.1006019.s003.pdf]
