# Supplementary material for: iDREM: Interactive visualization of dynamic regulatory networks
Source: PubMed Central journal article supplement (PMC5868853; doi:10.1371/journal.pcbi.1006019), 2018-03-14

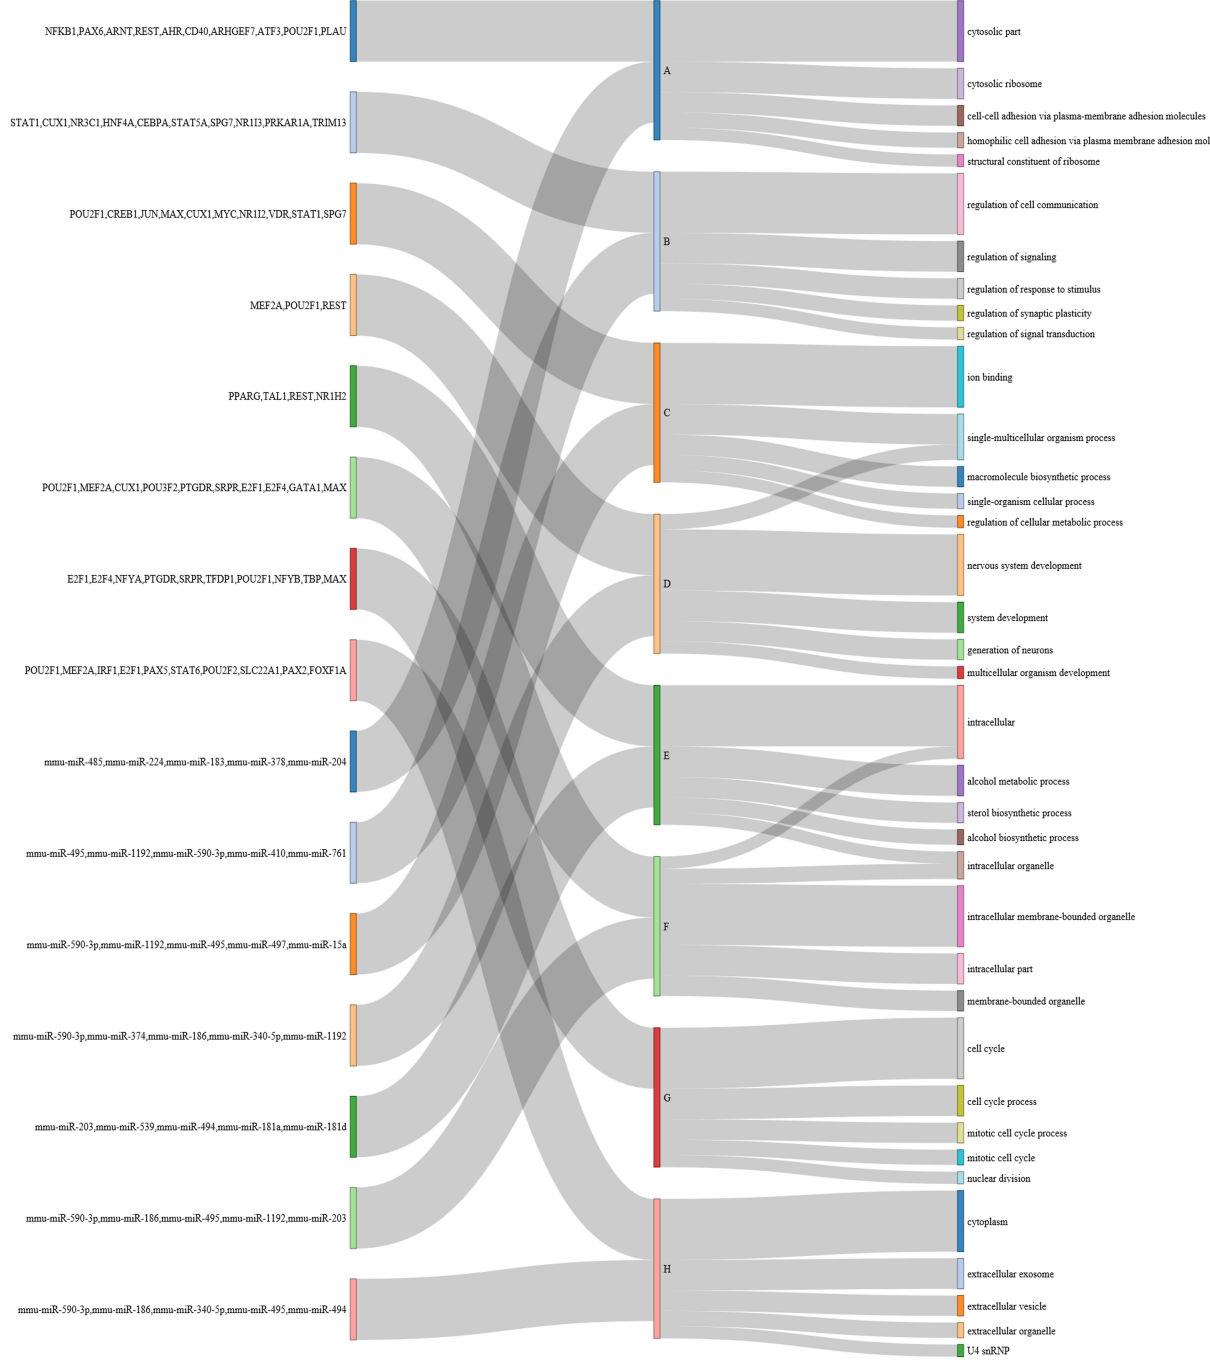

Supplement: pcbi.1006019.s007.pdf [file pcbi.1006019.s007.pdf]
